# Supplementary material for: Insights into secondary organic aerosol formation from the day- and nighttime oxidation of polycyclic aromatic hydrocarbons and furans in an oxidation flow reactor
Source: Copernicus journal article supplement (doi:10.5194/acp-23-15077-2023), 2023-12-07
Supplement: Supplementary file 2 [file acp-23-15077-2023-supplement.pdf]

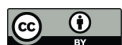

*Supplement of*

## **Insights into secondary organic aerosol formation from the day- and night-time oxidation of polycyclic aromatic hydrocarbons and furans in an oxidation flow reactor**

**Abd El Rahman El Mais et al.**

*Correspondence to:* Alexandre Albinet ([alexandre.albinet@gmail.com](mailto:alexandre.albinet@gmail.com), [alexandre.albinet@ineris.fr](mailto:alexandre.albinet@ineris.fr))

The copyright of individual parts of the supplement might differ from the article licence.

## Table of Contents

|                                                                                                                                                                                                                                                                                                                                                                                                                                 |    |
|---------------------------------------------------------------------------------------------------------------------------------------------------------------------------------------------------------------------------------------------------------------------------------------------------------------------------------------------------------------------------------------------------------------------------------|----|
| Calculation of the injected Furans concentrations .....                                                                                                                                                                                                                                                                                                                                                                         | 3  |
| TABLES .....                                                                                                                                                                                                                                                                                                                                                                                                                    | 4  |
| Table S1. Radical exposures in the PAM-OFR during both day and nighttime oxidation processes. ....                                                                                                                                                                                                                                                                                                                              | 4  |
| Table S2. Photon fluxes at 185 nm ( $I_{185}$ ) and 254 nm ( $I_{254}$ ) used as inputs to the OFR KinSim model in the case of OH radical. They were obtained by varying the model input flux values while keeping an $I_{185}$ to $I_{254}$ ratio of 0.0664 (Rowe et al., 2020) until the model output $O_3$ concentrations matched with $[O_3]_{PAM}$ . ....                                                                  | 4  |
| Table S3. Bimolecular rate coefficients of the studied SOA precursors with OH, $NO_3$ , and $O_3$ and their UV photo-absorption cross sections at/near 185 and 254 nm. ....                                                                                                                                                                                                                                                     | 5  |
| Table S4. Fixed filter loading compensation parameters $k(\lambda)$ used to manually compensate the AE33 data for each SOA precursor with the studied oxidant given the large jumps observed during the spot changes. ....                                                                                                                                                                                                      | 6  |
| Table S5. Air mass absorption efficiency values used for AE33 data (Drinovec et al., 2015). ....                                                                                                                                                                                                                                                                                                                                | 7  |
| Table S6. Slope, intercept, and regression of the linear fit of $\ln(b_{abs})$ as a function of $\ln(\lambda)$ over the wavelength range 370 - 590 nm used to evaluate the absorption Ångström exponent ( $\alpha$ ). ....                                                                                                                                                                                                      | 7  |
| Table S7. Comparison of Absorption Ångström exponent ( $\alpha$ ) and Mass Absorption cross section (MAC) obtained for naphthalene SOA with literature data. ....                                                                                                                                                                                                                                                               | 8  |
| FIGURES.....                                                                                                                                                                                                                                                                                                                                                                                                                    | 9  |
| Figure S1. Examples of Q-ACSM measurements showing the stable PAHs and furans SOA generation through day- and nighttime oxidation processes during experiments lasting up to 5 hours. ....                                                                                                                                                                                                                                      | 9  |
| Figure S2. Modeled time series of OH, $NO_3$ , and VOC as a function of the total residence time ( $\tau$ ) (KinSim model results). No results are shown for Furan and Flu with $NO_3$ radicals due to unstable SOA generation or no SOA formed. ....                                                                                                                                                                           | 10 |
| Figure S3. Example of AE33 automatic compensation and manual compensation on the time evolution of BC concentrations measured at different wavelengths for Naph SOA produced with OH radical. ....                                                                                                                                                                                                                              | 11 |
| Figure S4. Comparison of wavelength-dependent absorption optical properties ( $b_{abs}$ , and MAC) of PAHs and furans SOA generated from the day- and nighttime oxidation processes (with OH and $NO_3$ radicals respectively). Results were plotted as a function of $\lambda$ in the range of 370 to 590 nm. No results are shown for Furan and Flu with $NO_3$ radicals due to unstable SOA generation or no SOA formed..... | 12 |
| Figure S5. Variation of Absorption Ångström exponent ( $\alpha$ ) of the PAHs SOA generated from the day- and nighttime oxidation processes (with OH and $NO_3$ radicals respectively). No results are shown for Flu with $NO_3$ radicals because no SOA were formed. ....                                                                                                                                                      | 13 |
| REFERENCES .....                                                                                                                                                                                                                                                                                                                                                                                                                | 14 |

### Calculation of the injected furans concentrations

Furan concentrations were calculated using the syringe pump injection flow rate, temperature (T), analyte molecular weight (MM), density ( $\rho$ ), and total flow inside the PAM-OFR (Eq. (S1)).

$$[\ ]_{ppbv} = \frac{\rho \times \text{pump rate} \times R \times T}{MM \times P \times \text{Total flow}} \quad (\text{S1})$$

**TABLES**

**Table S1. Radical exposures in the PAM-OFR during both day and nighttime oxidation processes.**

| SOA precursor  | OH exp (molecules cm <sup>-3</sup> s) |                         | NO <sub>3</sub> exp (molecules cm <sup>-3</sup> s) |
|----------------|---------------------------------------|-------------------------|----------------------------------------------------|
|                | Experimental evaluation               | KinSim calculations     |                                                    |
| <b>2-MF</b>    | 8.09 x 10 <sup>11</sup>               | 1.13 x 10 <sup>12</sup> | 1.68 x 10 <sup>12</sup>                            |
| <b>2,5-DMF</b> | 4.05 x 10 <sup>11</sup>               | 7.61 x 10 <sup>11</sup> | 5.15 x 10 <sup>12</sup>                            |
| <b>Furan</b>   | nd <sup>1</sup>                       | 1.05 x 10 <sup>10</sup> | *                                                  |
| <b>Naph</b>    | 3.74 x 10 <sup>11</sup>               | 2.78 x 10 <sup>11</sup> | 2.10 x 10 <sup>14</sup>                            |
| <b>Acy</b>     | 1.05 x 10 <sup>12</sup>               | 1.51 x 10 <sup>12</sup> | 6.44 x 10 <sup>13</sup>                            |
| <b>Flu</b>     | 2.19 x 10 <sup>12</sup>               | 2.57 x 10 <sup>12</sup> | **                                                 |
| <b>Phe</b>     | 1.46 x 10 <sup>12</sup>               | 1.96 x 10 <sup>12</sup> | 2.08 x 10 <sup>14</sup>                            |

<sup>1</sup>not determined.

\*Unstable furan injection inducing an unstable SOA generation.

\*\*No SOA formed.

**Table S2. Photon fluxes at 185 nm ( $I_{185}$ ) and 254 nm ( $I_{254}$ ) used as inputs to the OFR KinSim model in the case of OH radical. They were obtained by varying the model input flux values while keeping an  $I_{185}$  to  $I_{254}$  ratio of 0.0664 (Rowe et al., 2020) until the model output O<sub>3</sub> concentrations matched with [O<sub>3</sub>]<sub>PAM</sub>.**

| SOA precursor  | [O <sub>3</sub> ] <sub>PAM</sub> (ppm) | $I_{185}$ (photons cm <sup>-2</sup> s <sup>-1</sup> ) | $I_{254}$ (photons cm <sup>-2</sup> s <sup>-1</sup> ) |
|----------------|----------------------------------------|-------------------------------------------------------|-------------------------------------------------------|
| <b>2-MF</b>    | 15                                     | 8.2 x 10 <sup>13</sup>                                | 1.23 x 10 <sup>15</sup>                               |
| <b>2,5-DMF</b> | 12                                     | 7.18 x 10 <sup>13</sup>                               | 1.08 x 10 <sup>15</sup>                               |
| <b>Furan</b>   | 7                                      | 3.38 x 10 <sup>13</sup>                               | 5.09 x 10 <sup>14</sup>                               |
| <b>Naph</b>    | 3                                      | 1.41 x 10 <sup>13</sup>                               | 2.12 x 10 <sup>14</sup>                               |
| <b>Acy</b>     | 4                                      | 2.03 x 10 <sup>13</sup>                               | 3.06 x 10 <sup>14</sup>                               |
| <b>Flu</b>     | 11                                     | 5.88 x 10 <sup>13</sup>                               | 8.86 x 10 <sup>14</sup>                               |
| <b>Phe</b>     | 10                                     | 4.85 x 10 <sup>13</sup>                               | 7.30 x 10 <sup>14</sup>                               |

**Table S3. Bimolecular rate coefficients of the studied SOA precursors with OH, NO<sub>3</sub>, and O<sub>3</sub> and their UV photo-absorption cross sections at/near 185 and 254 nm.**

| SOA precursor  | Bimolecular rate coefficients (cm <sup>3</sup> molecule <sup>-1</sup> s <sup>-1</sup> ) |                                       |                                         | Photo-absorption cross sections (σ <sub>i</sub> ) (cm <sup>2</sup> molecule <sup>-1</sup> ) |                                        |
|----------------|-----------------------------------------------------------------------------------------|---------------------------------------|-----------------------------------------|---------------------------------------------------------------------------------------------|----------------------------------------|
|                | k <sub>OH</sub>                                                                         | k <sub>NO<sub>3</sub></sub>           | k <sub>O<sub>3</sub></sub>              | λ = 185 nm                                                                                  | λ = 254 nm                             |
| <b>2-MF</b>    | 7.00 x 10 <sup>-11</sup> <sup>a</sup>                                                   | 2.57 x 10 <sup>-11</sup> <sup>b</sup> | 8.50 x 10 <sup>-17</sup> <sup>c</sup>   | 8.36 x 10 <sup>-18</sup> <sup>Δj</sup>                                                      | 3.79 x 10 <sup>-19</sup> <sup>Δj</sup> |
| <b>2,5-DMF</b> | 1.16 x 10 <sup>-10</sup> <sup>a</sup>                                                   | 5.78 x 10 <sup>-11</sup> <sup>b</sup> | 4.20 x 10 <sup>-16</sup> <sup>d</sup>   | 8.36 x 10 <sup>-18</sup> <sup>*</sup>                                                       | 3.79 x 10 <sup>-19</sup> <sup>*</sup>  |
| <b>Furan</b>   | 3.83 x 10 <sup>-11</sup> <sup>a</sup>                                                   | 1.30 x 10 <sup>-12</sup> <sup>d</sup> | 2.42 x 10 <sup>-18</sup> <sup>d</sup>   | 1.18 x 10 <sup>-17</sup> <sup>Δk</sup>                                                      | 2.59 x 10 <sup>-19</sup> <sup>Δk</sup> |
| <b>Naph</b>    | 2.30 x 10 <sup>-11</sup> <sup>a</sup>                                                   | 4.60 x 10 <sup>-17</sup> <sup>e</sup> | < 2.00 x 10 <sup>-19</sup> <sup>e</sup> | 2.67 x 10 <sup>-17</sup> <sup>Δl</sup>                                                      | 1.09 x 10 <sup>-17</sup> <sup>Δm</sup> |
| <b>Acy</b>     | 1.09 x 10 <sup>-10</sup> <sup>a</sup>                                                   | 5.45 x 10 <sup>-12</sup> <sup>f</sup> | 5.50 x 10 <sup>-16</sup> <sup>f</sup>   | 7.92 x 10 <sup>-17</sup> <sup>n</sup>                                                       | 2.74 x 10 <sup>-17</sup> <sup>n</sup>  |
| <b>Flu</b>     | 1.31 x 10 <sup>-11</sup> <sup>a</sup>                                                   | 1.52 x 10 <sup>-14</sup> <sup>g</sup> | < 2.00 x 10 <sup>-19</sup> <sup>h</sup> | 7.89 x 10 <sup>-17</sup> <sup>n</sup>                                                       | 2.57 x 10 <sup>-17</sup> <sup>n</sup>  |
| <b>Phe</b>     | 2.40 x 10 <sup>-11</sup> <sup>a</sup>                                                   | 1.20 x 10 <sup>-13</sup> <sup>i</sup> | 4.00 x 10 <sup>-19</sup> <sup>i</sup>   | 2.44 x 10 <sup>-17</sup> <sup>Δl</sup>                                                      | 3.06 x 10 <sup>-17</sup> <sup>Δl</sup> |

<sup>a</sup>(Database for the Kinetics of the Gas-Phase Atmospheric Reactions of Organic Compounds). <sup>b</sup>(Kind et al., 1996). <sup>c</sup>(Li et al., 2018). <sup>d</sup>(Jiang et al., 2020). <sup>e</sup>(Keyte et al., 2013). <sup>f</sup>(Atkinson and Aschmann, 1988). <sup>g</sup>(Ding et al., 2020). <sup>h</sup>(Kwok et al., 1997). <sup>i</sup>(Kwok et al., 1994).

<sup>Δ</sup>(The MPI-Mainz UV/VIS Spectral Atlas of Gaseous Molecules of Atmospheric Interest). <sup>j</sup>(Giuliani et al., 2003). <sup>k</sup>(Christianson et al., 2021). <sup>l</sup>(Kitagawa, 1968). <sup>m</sup>(Grosch et al., 2015). <sup>n</sup>(Theoretical spectral database of PAHs).

<sup>\*</sup>No information available in the literature. Assumed equal to the ones of 2-MF.

**Table S4. Fixed filter loading compensation parameters  $k(\lambda)$  used to manually compensate the AE33 data for each SOA precursor with the studied oxidant given the large jumps observed during the spot changes.**

|               |                 | Wavelength (nm) |         |         |         |
|---------------|-----------------|-----------------|---------|---------|---------|
|               |                 | 370             | 470     | 520     | 590     |
| SOA Precursor | Reactivity      | $k(\lambda)$    |         |         |         |
| <b>Naph</b>   | OH              | 0.00350         | 0.00570 | 0.02129 | 0.03687 |
|               | NO <sub>3</sub> | 0.00496         | 0.00665 | 0.02961 | 0.06053 |
| <b>Acy</b>    | OH              | 0.00444         | 0.00578 | 0.00034 | 0.01140 |
|               | NO <sub>3</sub> | 0.00376         | 0.00054 | 0.02944 | 0.07180 |
| <b>Flu</b>    | OH              | 0.00234         | 0.00610 | 0.03821 | 0.08846 |
|               | NO <sub>3</sub> | *               | *       | *       | *       |
| <b>Phe</b>    | OH              | 0.00492         | 0.01600 | 0.05480 | 0.12789 |
|               | NO <sub>3</sub> | **              | **      | **      | **      |

\* No data are shown for Flu with NO<sub>3</sub> radicals because no SOA were formed.

\*\*No jumps observed during the spot changes so no manual compensation was done. The same was obtained with furan SOA under both OH and NO<sub>3</sub> reactivities.

**Table S5. Air mass absorption efficiency values used for AE33 data (Drinovec et al., 2015).**

| Channel                                          | 1     | 2     | 3     | 4     | 5     | 6    | 7    |
|--------------------------------------------------|-------|-------|-------|-------|-------|------|------|
| Wavelength (nm)                                  | 370   | 470   | 520   | 590   | 660   | 880  | 950  |
| $\sigma_{\text{air}} (\text{m}^2 \text{g}^{-1})$ | 18.47 | 14.54 | 13.14 | 11.58 | 10.35 | 7.77 | 7.19 |

**Table S6. Slope, intercept, and regression of the linear fit of  $\ln(b_{\text{abs}})$  as a function of  $\ln(\lambda)$  over the wavelength range 370 - 590 nm used to evaluate the absorption Ångström exponent ( $\alpha$ ).**

|                               | Slope   | Intercept | R <sup>2</sup> |
|-------------------------------|---------|-----------|----------------|
| <b>OH radical</b>             |         |           |                |
| Naph                          | -5.4329 | -87.9898  | 0.9570         |
| Acy                           | -8.3516 | -132.1933 | 0.9939         |
| Flu                           | -6.0803 | -99.4019  | 0.9803         |
| Phe                           | -6.9225 | -112.1611 | 0.9951         |
| <b>NO<sub>3</sub> radical</b> |         |           |                |
| Naph                          | -5.5670 | -89.6167  | 0.9665         |
| Acy                           | -6.7757 | -107.7455 | 0.9698         |
| Flu                           | -       | -         | -              |
| Phe                           | -7.0470 | -115.1764 | 0.9910         |

**Table S7. Comparison of Absorption Ångström exponent ( $\alpha$ ) and Mass Absorption cross section (MAC) obtained for naphthalene SOA with literature data.**

| Experimental conditions                                  | Methodology                                                                                | $\lambda$ range (nm) | $\alpha$        | MAC, 400-405 nm ( $\text{m}^2 \text{g}^{-1}$ ) | References             |
|----------------------------------------------------------|--------------------------------------------------------------------------------------------|----------------------|-----------------|------------------------------------------------|------------------------|
| OH, OFR, without $\text{NO}_x$ , RH = 41%                | 7 $\lambda$ AE33                                                                           | 370 - 590            | $5.43 \pm 0.15$ | 0.22                                           | This study             |
| $\text{NO}_3$ , OFR, without $\text{NO}_x$ , RH = 43%    |                                                                                            |                      | $5.57 \pm 0.12$ | 0.22                                           |                        |
| OH, smog chamber, low $\text{NO}_x$ , RH = 0 - 89 %      | UV-Vis measurements of SOA filter extracts                                                 | 280 - 680            | 5.5 - 7.6       | 0.15-0.26                                      | (Klodt et al., 2023)   |
| OH, smog chamber, high $\text{NO}_x$ , RH = 0 - 94 %     |                                                                                            |                      |                 | 0.2-0.35                                       |                        |
| OH, OFR, $\text{NO}_x$ , RH = 39%                        | HPLC equipped with a photodiode array detector and electrospray ionization HR-MS           | 315 - 650            | -               | 0.22-0.38                                      | (He et al., 2022)      |
| OH, OFR, low $\text{NO}_x$ , RH = 38%                    | HPLC equipped with a photodiode array detector and electrospray ionization HR-MS           | 300 - 450            | 8.87            | 0.12                                           | (Siemens et al., 2022) |
| OH, OFR, high $\text{NO}_x$ , RH = 38%                   |                                                                                            |                      | 7.59            | 0.19                                           |                        |
| OH, smog chamber, $\text{H}_2\text{O}_2$ , RH = 12 - 15% | UV-Vis measurements of SOA filter extracts                                                 | 300 - 550            | $6.46 \pm 0.25$ | 0.35                                           | (Xie et al., 2017)     |
| OH, smog chamber, high $\text{NO}_x$ , RH = 10 - 19%     |                                                                                            |                      | $4.92 \pm 0.23$ | 0.78                                           |                        |
| OH, smog chamber, high $\text{NO}_x$ , dry               | UV-Vis measurements of SOA filter extracts                                                 | 400 - 630            | 6.2             | 0.12                                           | (Lee et al., 2014)     |
| OH, OFR, without $\text{NO}_x$ , RH = 30 - 40%           | UV-Vis measurements of SOA filter extracts and cavity ring-down photoacoustic spectrometry | 300 - 500            | 5.2 - 6.6       | 0.02 - 0.09                                    | (Lambe et al., 2013)   |
| OH, smog chamber, high $\text{NO}_x$ , seed, RH < 5%     | 3 $\lambda$ photoacoustic soot spectrometer (PASS-3)                                       | 405 - 781            | >3.53           | $0.81 \pm 0.32$                                | (Metcalf et al., 2013) |
| OH, smog chamber, without $\text{NO}_x$ , RH < 2%        | UV-Vis measurements of SOA filter extracts                                                 | 400 - 630            | 6.2             | 0.07                                           | (Updyke et al., 2012)  |
| OH, smog chamber, with $\text{NO}_x$ , RH < 2%           |                                                                                            |                      | 6.7             | 0.22                                           |                        |



## FIGURES

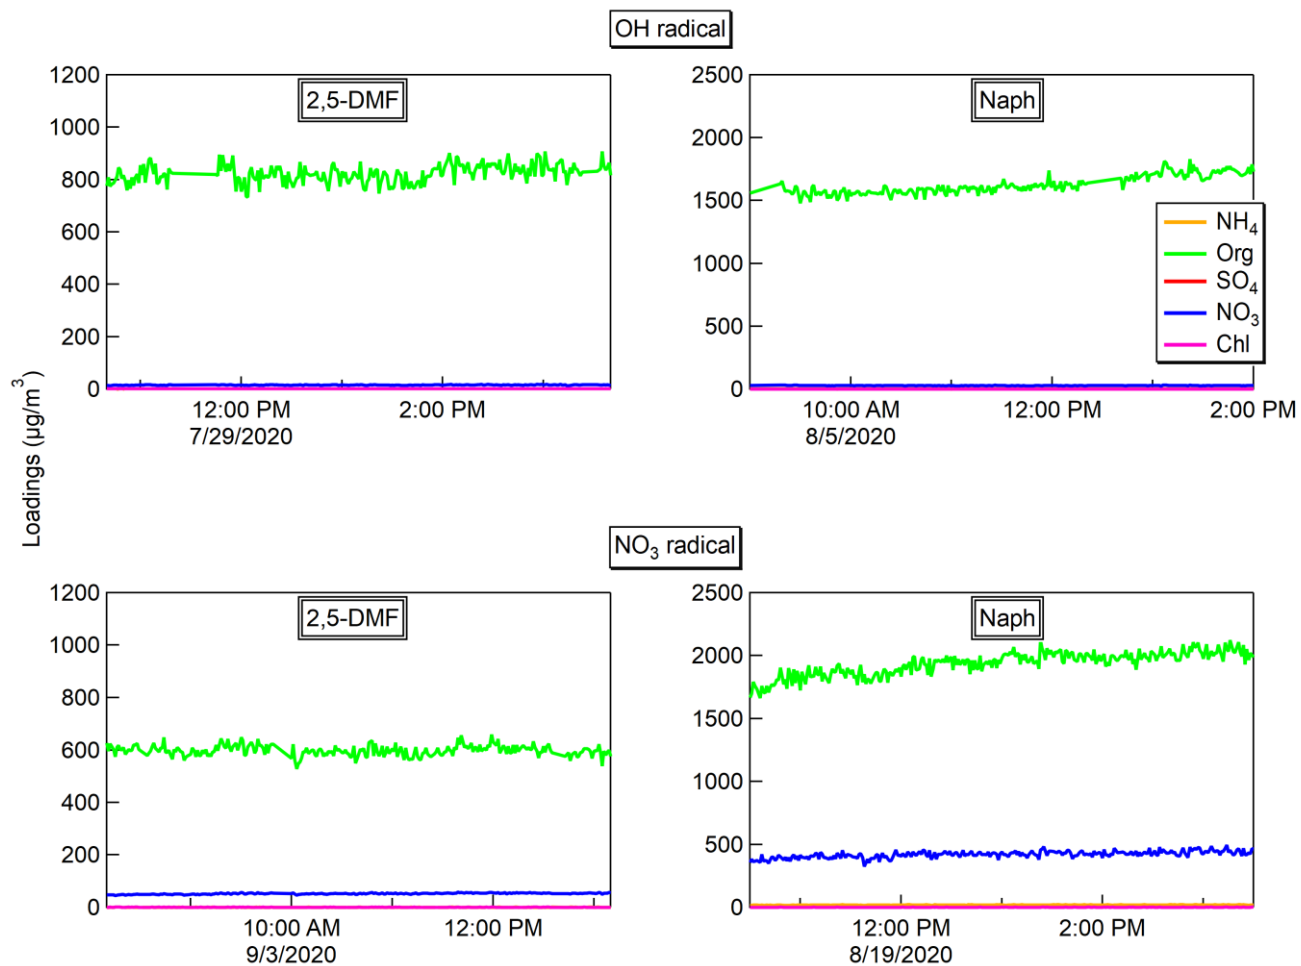

**Figure S1. Examples of Q-ACSM measurements showing the stable PAHs and furans SOA generation through day- and nighttime oxidation processes during experiments lasting up to 5 hours.**

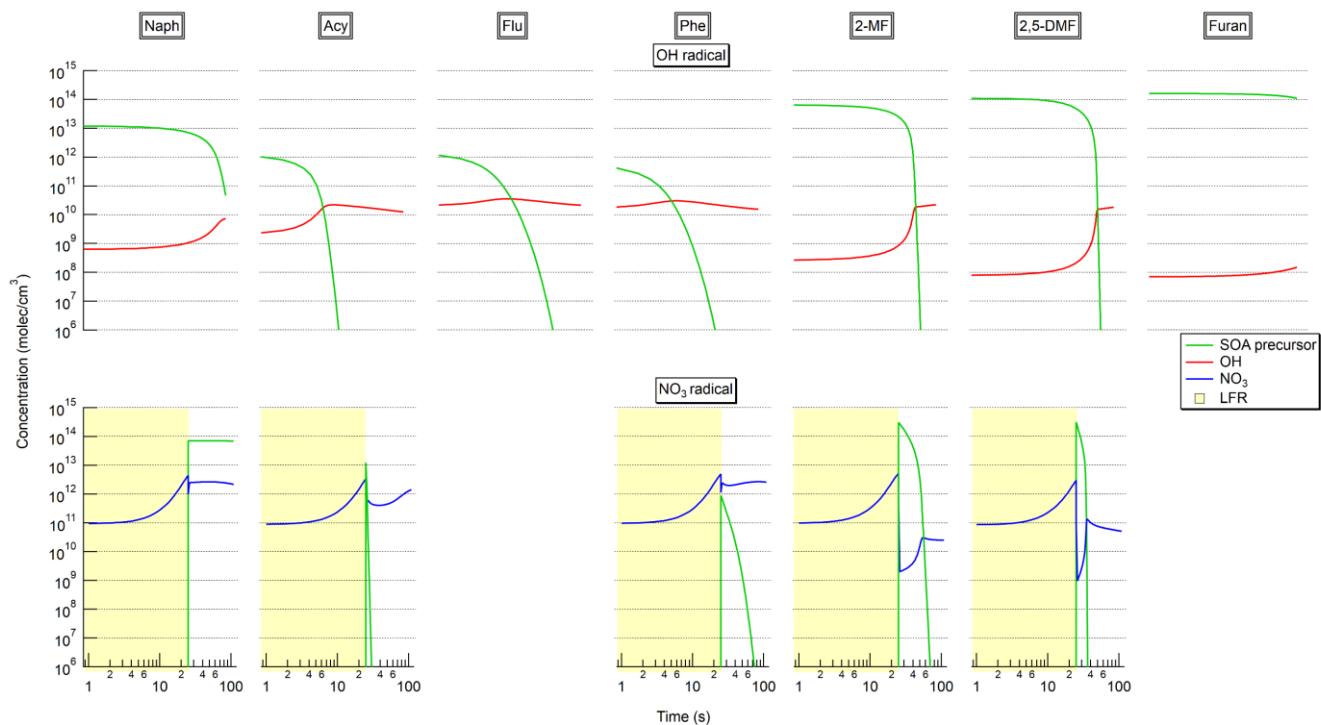

**Figure S2. Modeled time series of OH, NO<sub>3</sub>, and VOC as a function of the total residence time ( $\tau$ ) (KinSim model results). No results are shown for Furan and Flu with NO<sub>3</sub> radicals due to unstable SOA generation or no SOA formed.**

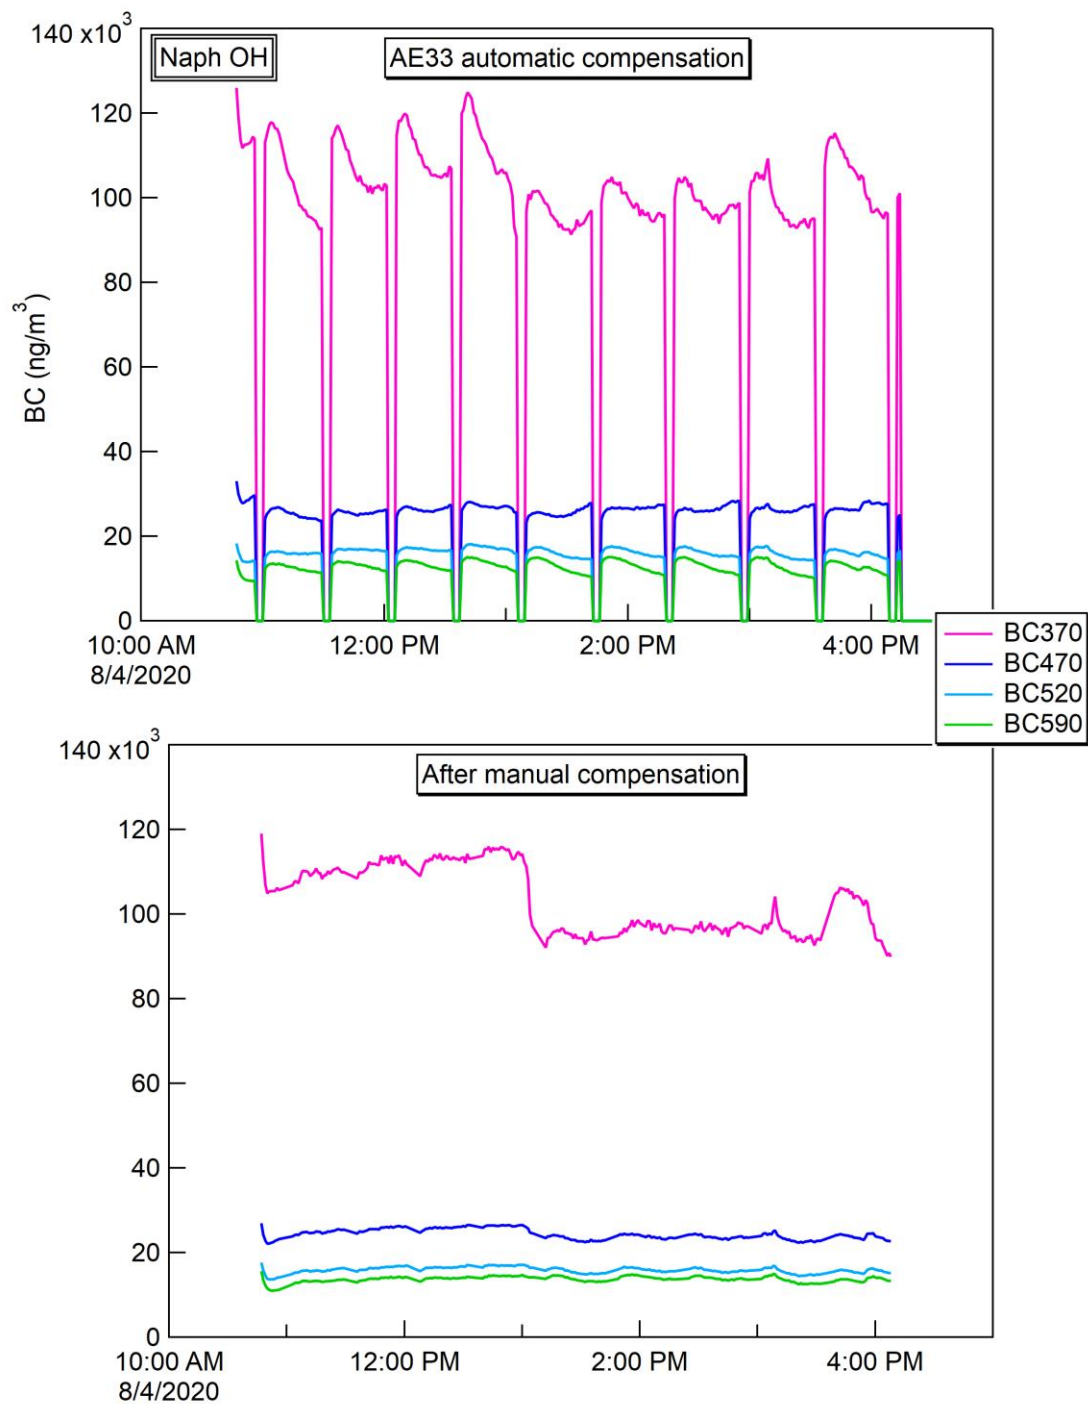

**Figure S3.** Example of AE33 automatic compensation and manual compensation on the time evolution of BC concentrations measured at different wavelengths for Naph SOA produced with OH radical.

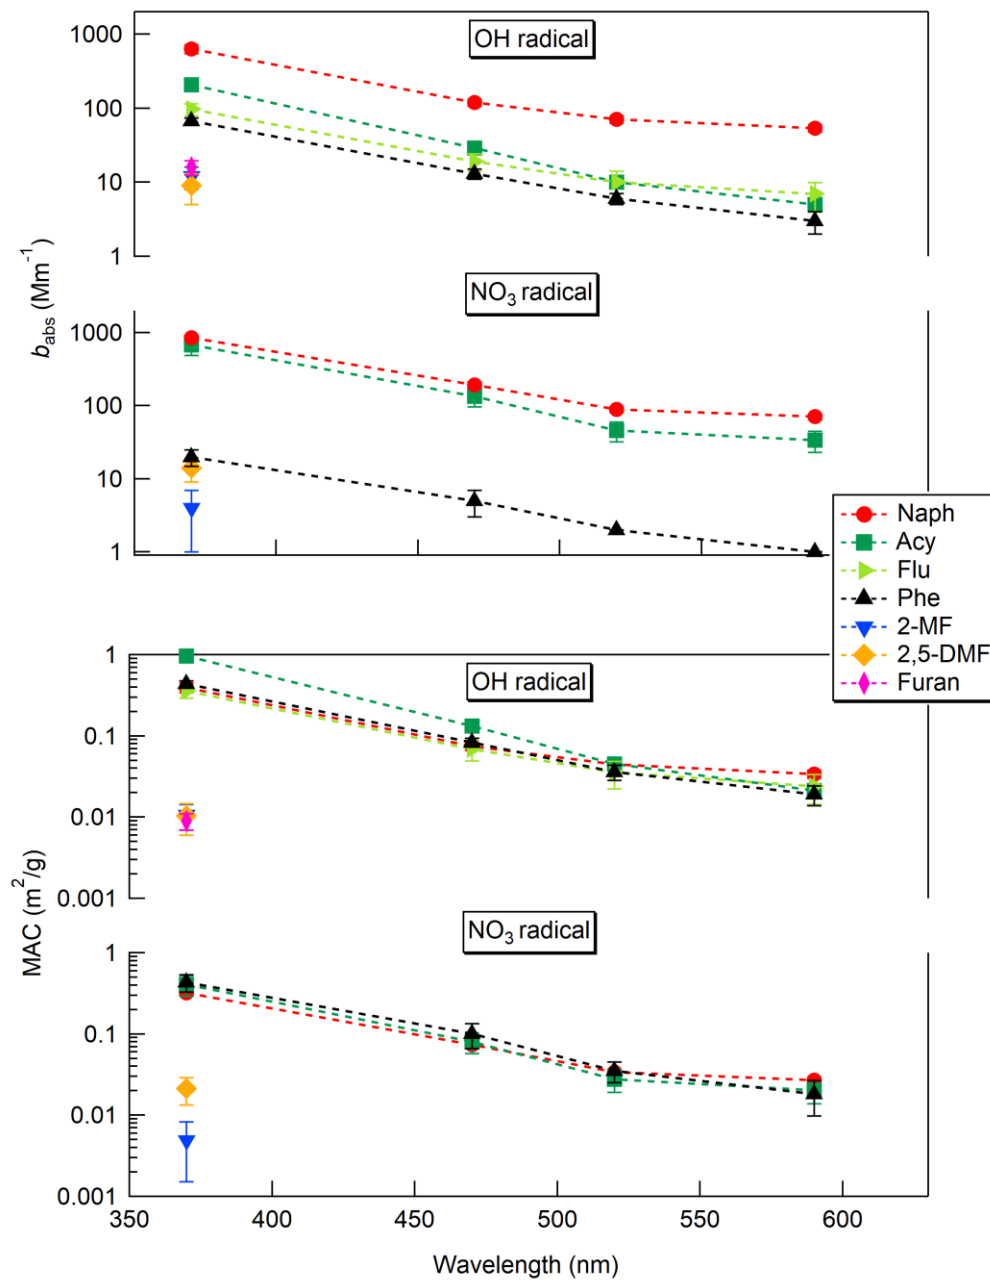

**Figure S4. Comparison of wavelength-dependent absorption optical properties ( $b_{abs}$ , and MAC) of PAHs and furans SOA generated from the day- and nighttime oxidation processes (with OH and  $NO_3$  radicals respectively). Results were plotted as a function of  $\lambda$  in the range of 370 to 590 nm. No results are shown for Furan and Flu with  $NO_3$  radicals due to unstable SOA generation or no SOA formed.**

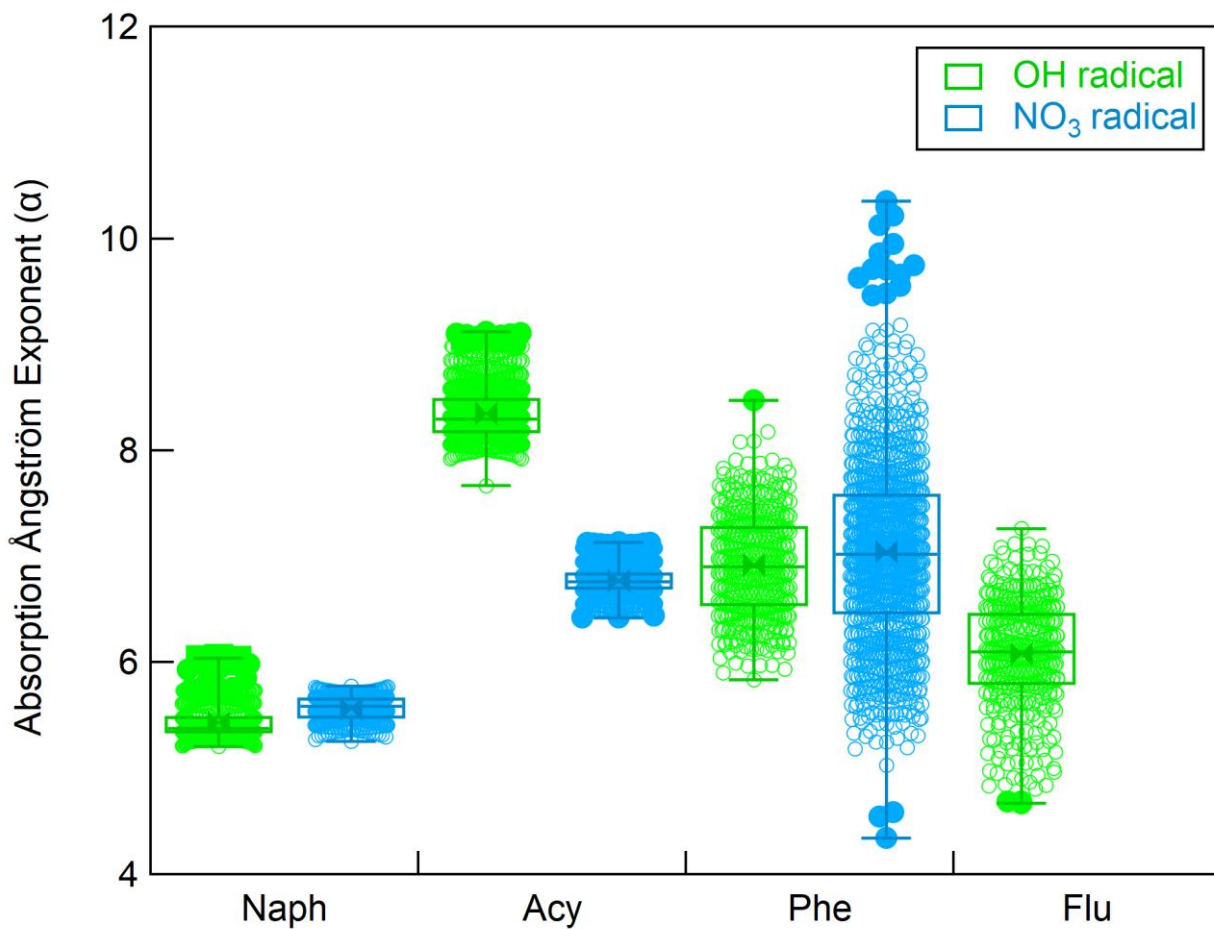

Figure S5. Variation of Absorption Ångström exponent ( $\alpha$ ) of the PAHs SOA generated from the day- and nighttime oxidation processes (with OH and NO<sub>3</sub> radicals respectively). No results are shown for Flu with NO<sub>3</sub> radicals because no SOA were formed.

## REFERENCES

The MPI-Mainz UV/VIS Spectral Atlas of Gaseous Molecules of Atmospheric Interest: <https://essd.copernicus.org/articles/5/365/2013/>.

Database for the Kinetics of the Gas-Phase Atmospheric Reactions of Organic Compounds: <https://data.eurochamp.org/data-access/kin/#/data>.

Theoretical spectral database of PAHs: <https://www.dsf.unica.it/~gmallocci/pahs/index.html>.

Atkinson, R. and Aschmann, S. M.: Kinetics of the reactions of acenaphthene and acenaphthylene and structurally-related aromatic compounds with OH and NO<sub>3</sub> radicals, N<sub>2</sub>O<sub>5</sub> and O<sub>3</sub> at 296 ± 2 K: KINETICS OF GAS-PHASE REACTIONS, *Int. J. Chem. Kinet.*, 20, 513–539, <https://doi.org/10.1002/kin.550200703>, 1988.

Christianson, M. G., Doner, A. C., Koritzke, A. L., Frandsen, K., and Rotavera, B.: Vacuum-ultraviolet absorption cross-sections of functionalized cyclic hydrocarbons: Five-membered rings, *Journal of Quantitative Spectroscopy and Radiative Transfer*, 258, 107274, <https://doi.org/10.1016/j.jqsrt.2020.107274>, 2021.

Ding, Z., Yi, Y., Wang, W., and Zhang, Q.: Understanding the role of Cl and NO<sub>3</sub> radicals in initiating atmospheric oxidation of fluorene: A mechanistic and kinetic study, *Science of The Total Environment*, 716, 136905, <https://doi.org/10.1016/j.scitotenv.2020.136905>, 2020.

Drinovec, L., Močnik, G., Zotter, P., Prévôt, A. S. H., Ruckstuhl, C., Coz, E., Rupakheti, M., Sciare, J., Müller, T., Wiedensohler, A., and Hansen, A. D. A.: The “dual-spot” Aethalometer: an improved measurement of aerosol black carbon with real-time loading compensation, *Atmospheric Measurement Techniques*, 8, 1965–1979, <https://doi.org/10.5194/amt-8-1965-2015>, 2015.

Giuliani, A., Delwiche, J., Hoffmann, S. V., Limão-Vieira, P., Mason, N. J., and Hubin-Franskin, M.-J.: 2-methyl furan: An experimental study of the excited electronic levels by electron energy loss spectroscopy, vacuum ultraviolet photoabsorption, and photoelectron spectroscopy, *J. Chem. Phys.*, 119, 3670–3680, <https://doi.org/10.1063/1.1590960>, 2003.

Grosch, H., Sárossy, Z., Egsgaard, H., and Fateev, A.: UV absorption cross-sections of phenol and naphthalene at temperatures up to 500°C, *Journal of Quantitative Spectroscopy and Radiative Transfer*, 156, 17–23, <https://doi.org/10.1016/j.jqsrt.2015.01.021>, 2015.

He, Q., Li, C., Siemens, K., Morales, A. C., Hettiyadura, A. P. S., Laskin, A., and Rudich, Y.: Optical Properties of Secondary Organic Aerosol Produced by Photooxidation of Naphthalene under NO<sub>x</sub> Condition, *Environ. Sci. Technol.*, 56, 4816–4827, <https://doi.org/10.1021/acs.est.1c07328>, 2022.

Jiang, J., Carter, W. P. L., Cocker, D. R. I., and Barsanti, K. C.: Development and Evaluation of a Detailed Mechanism for Gas-Phase Atmospheric Reactions of Furans, *ACS Earth Space Chem.*, 4, 1254–1268, <https://doi.org/10.1021/acsearthspacechem.0c00058>, 2020.

Keyte, I. J., Harrison, R. M., and Lammel, G.: Chemical reactivity and long-range transport potential of polycyclic aromatic hydrocarbons – a review, *Chem. Soc. Rev.*, 42, 9333, <https://doi.org/10.1039/c3cs60147a>, 2013.

Kind, I., Berndt, T., Böge, O., and Rolle, W.: Gas-phase rate constants for the reaction of NO<sub>3</sub> radicals with furan and methyl-substituted furans, *Chemical Physics Letters*, 256, 679–683, [https://doi.org/10.1016/0009-2614\(96\)00513-1](https://doi.org/10.1016/0009-2614(96)00513-1), 1996.

- Kitagawa, T.: Absorption spectra and photoionization of polycyclic aromatics in vacuum ultraviolet region, *Journal of Molecular Spectroscopy*, 26, 1–23, [https://doi.org/10.1016/0022-2852\(68\)90139-2](https://doi.org/10.1016/0022-2852(68)90139-2), 1968.
- Klodt, A., Aiona, P., MacMillan, A., Lee, H. J. (Julie), Zhang, X., Helgestad, T., Novak, G., Lin, P., Laskin, J., Laskin, A., Bertram, T., Cappa, C., and Nizkorodov, S. A.: Effect of Relative Humidity, NO<sub>x</sub>, and Ammonia on Physical Properties of Naphthalene Secondary Organic Aerosol, *Environ. Sci.: Atmos.*, <https://doi.org/10.1039/D3EA00033H>, 2023.
- Kwok, E. S. C., Harger, W. P., Arey, Janet., and Atkinson, Roger.: Reactions of Gas-Phase Phenanthrene under Simulated Atmospheric Conditions, *Environ. Sci. Technol.*, 28, 521–527, <https://doi.org/10.1021/es00052a027>, 1994.
- Kwok, E. S. C., Atkinson, R., and Arey, J.: Kinetics of the gas-phase reactions of indan, indene, fluorene, and 9,10-dihydroanthracene with OH radicals, NO<sub>3</sub> radicals, and O<sub>3</sub>, *International Journal of Chemical Kinetics*, 29, 299–309, [https://doi.org/10.1002/\(SICI\)1097-4601\(1997\)29:4<299::AID-KIN9>3.0.CO;2-P](https://doi.org/10.1002/(SICI)1097-4601(1997)29:4<299::AID-KIN9>3.0.CO;2-P), 1997.
- Lambe, A. T., Cappa, C. D., Massoli, P., Onasch, T. B., Forestieri, S. D., Martin, A. T., Cummings, M. J., Croasdale, D. R., Brune, W. H., Worsnop, D. R., and Davidovits, P.: Relationship between Oxidation Level and Optical Properties of Secondary Organic Aerosol, *Environ. Sci. Technol.*, 47, 6349–6357, <https://doi.org/10.1021/es401043j>, 2013.
- Lee, H. J. (Julie), Aiona, P. K., Laskin, A., Laskin, J., and Nizkorodov, S. A.: Effect of Solar Radiation on the Optical Properties and Molecular Composition of Laboratory Proxies of Atmospheric Brown Carbon, *Environ. Sci. Technol.*, 48, 10217–10226, <https://doi.org/10.1021/es502515r>, 2014.
- Li, M., Liu, Y., and Wang, L.: Gas-phase ozonolysis of furans, methylfurans, and dimethylfurans in the atmosphere, *Phys. Chem. Chem. Phys.*, 20, 24735–24743, <https://doi.org/10.1039/C8CP04947E>, 2018.
- Metcalf, A. R., Loza, C. L., Coggon, M. M., Craven, J. S., Jonsson, H. H., Flagan, R. C., and Seinfeld, J. H.: Secondary Organic Aerosol Coating Formation and Evaporation: Chamber Studies Using Black Carbon Seed Aerosol and the Single-Particle Soot Photometer, *Aerosol Science and Technology*, 47, 326–347, <https://doi.org/10.1080/02786826.2012.750712>, 2013.
- Rowe, J. P., Lambe, A. T., and Brune, W. H.: Technical Note: Effect of varying the  $\lambda = 185$  and 254 nm photon flux ratio on radical generation in oxidation flow reactors, *Atmospheric Chemistry and Physics*, 20, 13417–13424, <https://doi.org/10.5194/acp-20-13417-2020>, 2020.
- Siemens, K., Morales, A., He, Q., Li, C., Hettiyadura, A. P. S., Rudich, Y., and Laskin, A.: Molecular Analysis of Secondary Brown Carbon Produced from the Photooxidation of Naphthalene, *Environ. Sci. Technol.*, 56, 3340–3353, <https://doi.org/10.1021/acs.est.1c03135>, 2022.
- Updyke, K. M., Nguyen, T. B., and Nizkorodov, S. A.: Formation of brown carbon via reactions of ammonia with secondary organic aerosols from biogenic and anthropogenic precursors, *Atmospheric Environment*, 63, 22–31, <https://doi.org/10.1016/j.atmosenv.2012.09.012>, 2012.
- Xie, M., Chen, X., Hays, M. D., Lewandowski, M., Offenberg, J., Kleindienst, T. E., and Holder, A. L.: Light Absorption of Secondary Organic Aerosol: Composition and Contribution of Nitroaromatic Compounds, *Environ. Sci. Technol.*, 51, 11607–11616, <https://doi.org/10.1021/acs.est.7b03263>, 2017.
